# Supplementary material for: Enhanced photocatalytic hydrogen evolution and ammonia sensitivity of double-heterojunction g-C3N4/TiO2/CuO
Source: Royal Society of Chemistry journal article supplement (doi:10.1039/d2ra01918c), 2022-01-01
Supplement: d2ra01918c1.pdf [file d2ra01918c1.pdf]

## Enhanced photocatalytic hydrogen evolution and ammonia sensitivity from double-heterojunction g-C<sub>3</sub>N<sub>4</sub>/TiO<sub>2</sub>/CuO

Lei Dai <sup>a</sup>, Fazhe Sun <sup>b</sup>, Peng Fu <sup>\*a</sup>, Hetong Li <sup>a</sup>

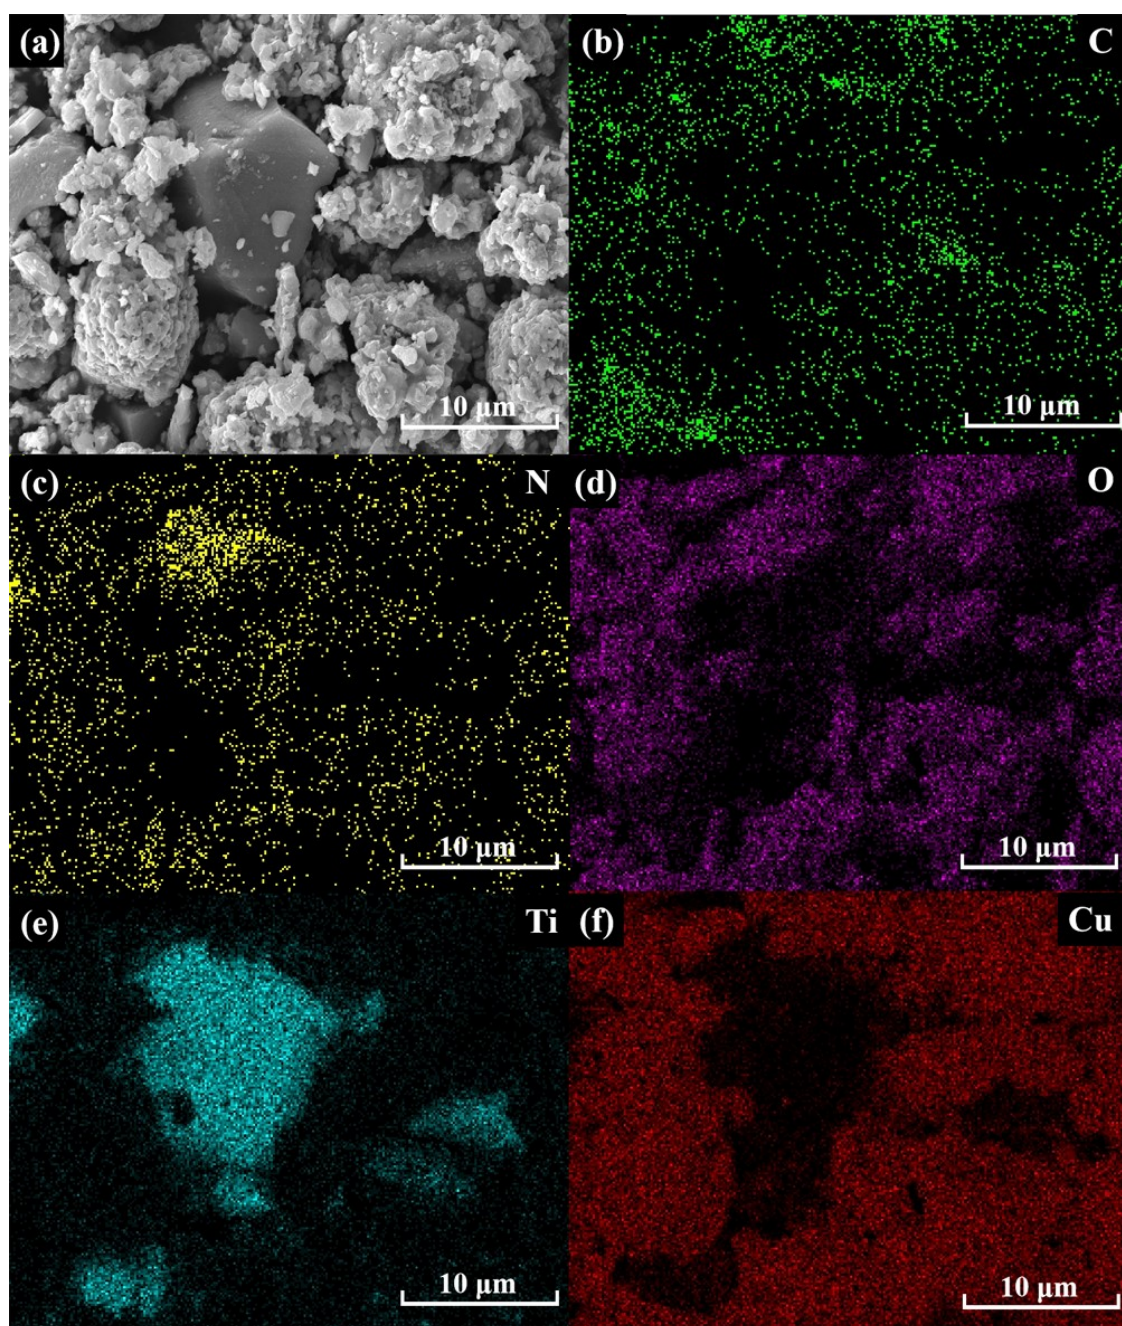

Fig. S 1. (a) SEM image of g-C<sub>3</sub>N<sub>4</sub>/TiO<sub>2</sub>/CuO and elemental mapping of (b) C, (c) N, (d) O, (e) Ti, and (f)

Cu for g-C<sub>3</sub>N<sub>4</sub>/TiO<sub>2</sub>/CuO.
